# Supplementary material for: Born in Bradford, a cohort study of babies born in Bradford, and their parents: Protocol for the recruitment phase
Source: PubMed Central journal article supplement (PMC2562385; doi:10.1186/1471-2458-8-327), 2008-09-23
Supplement: 1471-2458-8-327-S7.pdf [file 1471-2458-8-327-S7.pdf]

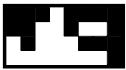

51527

# Born in Bradford Husband/Partner Questionnaire 1

Mother's BIB Study ID  P

Date Completing this questionnaire?  /  /   
d d m m y y y y

What language was used for administering the questionnaire?

English  Urdu (Mark answer with cross)

Husband/Partner's Height? Fathers Weight?

.  (Cms) .  (Kilos)

**Thank you for agreeing to complete this questionnaire.**

1. What age were you when you finished your education? Please CROSS ONE box only

16 or under  17 - 19  20 or over

2. What job do you do?

Please write in below your job title. (If you do not currently work write in your last main job)

3. If you were not born in the UK how old were you when you moved permanently to the UK?

(Years)  (Months)

4. Do you smoke cigarettes nowadays? (Please CROSS ONE box only)

Yes  No

4a) If you answered YES, about how many cigarettes a day do you smoke?

1-5 Cigarettes  6-10 Cigarettes  11-20 Cigarettes  Over 20  Don't Know

5. Do you drink alcohol, for example beer, wine or spirits? Please CROSS ONE box only

Yes  No

5a) If YES, what is, on average, the weekly average number of units you drink?

ONE unit = 1/2 Pint Beer/Lager/Cider, a Small Glass of Wine or a Single measure of spirits.

Add up all the number of units, of any sort of alcohol, in a typical week.

Average number of units per week

Thank you very much for completing this questionnaire. Please return it to the person who asked you to complete it.
